# Supplementary material for: Biological invasion and biological control select for different life histories
Source: PubMed Central journal article supplement (PMC4458860; doi:10.1038/ncomms8268), 2015-06-02
Supplement: ncomms8268-s1.pdf [file ncomms8268-s1.pdf]

**Supplementary Figure 1. Lifetime dynamics of egg production: raw data.** Each line joins the number of egg produced weekly by one individual, until its death.

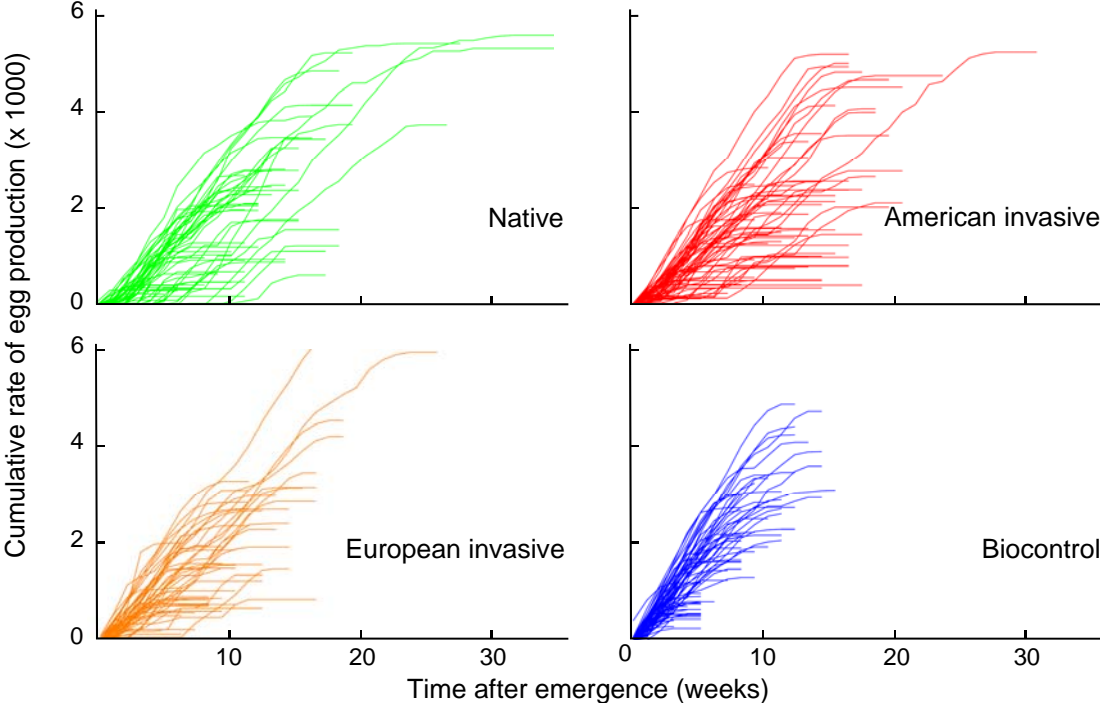

**Supplementary Figure 2. Mean rate of egg production per week for the four types of populations.**

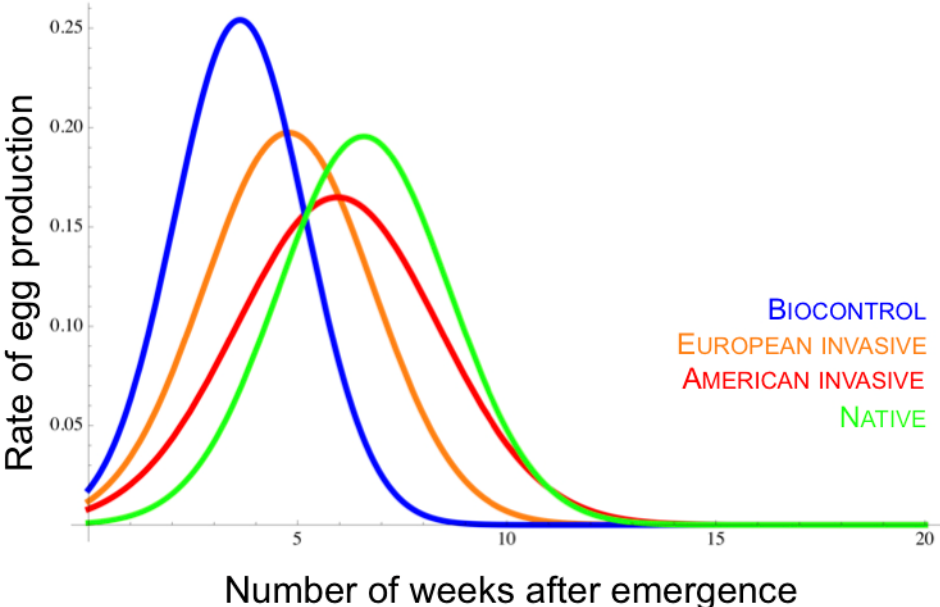

**Supplementary Figure 3. Relationship between the age at and duration of fecundity peak in the four types of populations. B = Biocontrol, A = European invasive, P = American invasive, N = Native.**

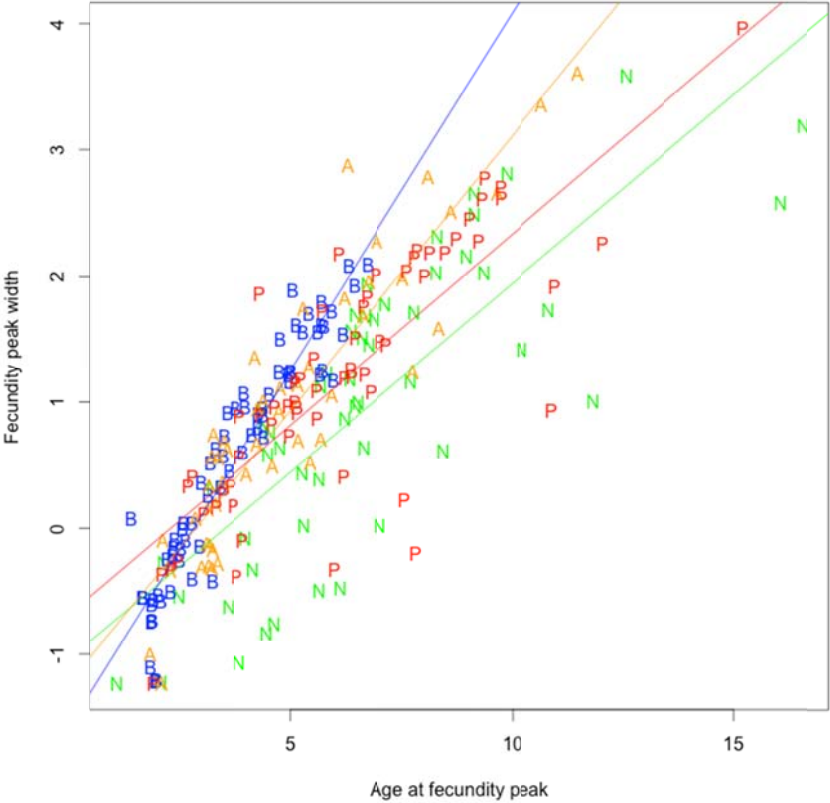

**Supplementary Figure 4. Mean larval traits for native and invasive populations (with 95% confidence intervals).** Triangle represent hatching rate and rectangle represent larval survival. Data are retrieved from Facon B. *et al.* Inbreeding depression is purged in the invasive insect *Harmonia axyridis*. *Curr. Biol.* **21**, 424–427 (2011).

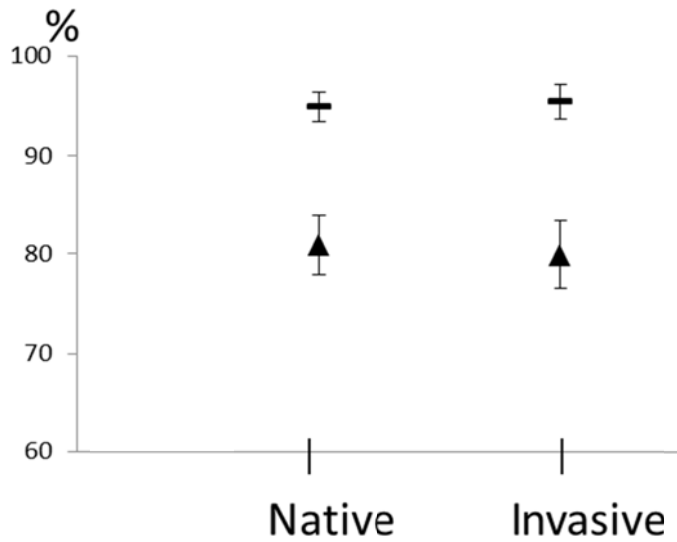

**Supplementary Table 1. Details of statistical analyses for the different studied traits.**

<sup>1</sup>Origin in all models is treated as a fixed effect, and tested with type III *F* statistics, with denominator degrees of freedom calculated using either the Satterthwaite or kr approximation.

<sup>2</sup>Population(origin) and block are treated as random effects in all models, and are tested with likelihood ratio tests in which the test statistic is distributed as  $\chi^2$ . These tests have one degree of freedom because they are one-sided.

| Source                           | Test statistic | d.f.    | P-value  |
|----------------------------------|----------------|---------|----------|
| <b>Average daily fecundity</b>   |                |         |          |
| Origin <sup>1</sup>              | 5.17           | 3, 75.9 | 0.003    |
| Population (origin) <sup>2</sup> | 0.1            | 1       | 0.38     |
| Block <sup>2</sup>               | 0              | 1       | 0.5      |
| <b>Total fecundity</b>           |                |         |          |
| Origin                           | 4.67           | 3, 238  | 0.003    |
| Population (origin)              | 17.2           | 1       | 0.00002  |
| Block                            | 6.8            | 1       | 0.005    |
| <b>Age of first reproduction</b> |                |         |          |
| Origin                           | 35.83          | 3, 236  | < 0.0001 |
| Population (origin)              | 0              | 1       | 0.5      |
| Block                            | 0              | 1       | 0.5      |
| <b>Reproductive lifespan</b>     |                |         |          |
| <i>Fixed effect</i>              |                |         |          |
| Origin                           | 10.4           | 3, 236  | < 0.0001 |
| Population (origin)              | 14.2           | 1       | 0.00008  |
| Block                            | 9.8            | 1       | 0.0009   |
| <b>Adult lifespan</b>            |                |         |          |
| <i>Fixed effect</i>              |                |         |          |
| Origin                           | 36.4           | 3, 3.88 | 0.003    |
| Population (origin)              | 0              | 1       | 0.5      |
| Block                            | 12.9           | 1       | 0.0002   |

**Supplementary Table 2. Means and 95% CI for the measured traits.**

|             | Average daily fecundity (# eggs) | Lifetime egg production (# eggs) | Age of first reproduction (weeks after emergence) | Reproductive lifespan (weeks) | Adult lifespan (weeks) |
|-------------|----------------------------------|----------------------------------|---------------------------------------------------|-------------------------------|------------------------|
| Native      | 35.3 (31.3-39.8)                 | 3033.0 (2253.8-4081.6)           | 2.4 (2.1-2.6)                                     | 11.7 (9.1-15.1)               | 17.7 (15-20.8)         |
| Invasive US | 33.6 (29.0-39.0)                 | 5001.5 (3319.2-7536.6)           | 1.7 (1.5-1.9)                                     | 19.4 (13.6-27.6)              | 22.7 (17.9-28.8)       |
| Invasive EU | 33.5 (28.9-38.8)                 | 3802.1 (2570.1-5624.6)           | 1.4 (1.3-1.6)                                     | 15 (10.7-20.9)                | 16.5 (13.2-20.6)       |
| Biocontrol  | 42.0 (37.2-47.4)                 | 3178.6 (2310.7-4372.5)           | 1.2 (1-1.3)                                       | 10.2 (7.7-13.4)               | 10.9 (9.1-13.0)        |

**Supplementary Table 3. Means and 95% CI for the traits estimated from individual nonlinear regression over individual egg production timing for the four different origins.**

|             | Duration of fecundity peak<br>( $\sigma$ ) in weeks | Age of peak fecundity ( $\mu$ ) in<br>weeks |
|-------------|-----------------------------------------------------|---------------------------------------------|
| Native      | 2.04 (1.65-2.47)                                    | 6.58 (5.77-7.44)                            |
| Invasive US | 2.42 (2.08-2.79)                                    | 5.95 (5.33-6.60)                            |
| Invasive EU | 2.02 (1.64-2.43)                                    | 4.78 (4.19-5.41)                            |
| Biocontrol  | 1.57 (1.32-1.84)                                    | 3.62 (3.28-3.98)                            |

**Supplementary Table 4. ANCOVA summary for  $\text{boxcox}(\sigma) \sim \mu^* \text{pop}$ .**

| Response variable: $\sigma$ | Df  | SumSq  | MeanSq | F value | Pr(>F)   |     |
|-----------------------------|-----|--------|--------|---------|----------|-----|
| $\mu$                       | 1   | 169.45 | 169.45 | 599.79  | <2e-16   | *** |
| Origin                      | 3   | 11.85  | 3.95   | 13.98   | 2.17e-08 | *** |
| $\mu$ :origin               | 3   | 11.01  | 3.67   | 12.99   | 7.38e-08 | *** |
| Residuals                   | 225 | 63.57  | 0.28   |         |          |     |



**Supplementary Table 5. *P*-value of factor origin for duration of fecundity peak,  $\sigma$ , in an ANCOVA conducted on pairs of origins.**

| Pair of populations            | P-value of factor origin | P-value of interaction |
|--------------------------------|--------------------------|------------------------|
| Native-American invasive       | 0.0038                   | NS                     |
| Biocontrol – Native            | < 0.0001                 | < 0.0001               |
| Biocontrol – European invasive | 0.0047                   | 0.0045                 |
| Biocontrol – American Invasive | 0.0046                   | < 0.0001               |

**Supplementary Table 6. ANOVA table for  $\text{boxcox}(\mu) \sim \sigma + \text{pop}$  on the whole dataset.**

| Response variable: $\mu$ | Df  | Sum Sq | Mean Sq | Fvalue | Pr(>F) |     |
|--------------------------|-----|--------|---------|--------|--------|-----|
| $\sigma$                 | 1   | 112.34 | 112.34  | 743.92 | <2e-16 | *** |
| factor(pop)              | 3   | 13.76  | 4.59    | 30.37  | <2e-16 | *** |
| Residuals                | 228 | 34.43  | 0.15    |        |        |     |

**Supplementary Table 7. Multiple mean comparisons between population origins using Tukey procedure.**

|                | Difference | Lower bound | Upper bound | P-value   |
|----------------|------------|-------------|-------------|-----------|
| EurInv-Bio     | 0.1582013  | -0.03025571 | 0.3466584   | 0.1340396 |
| AmerInv-Bio    | 0.3903685  | 0.21450210  | 0.5662349   | 0.0000002 |
| Nat-Bio        | 0.6298793  | 0.44560179  | 0.8141567   | 0.0000000 |
| AmerInv-EurInv | 0.2321672  | 0.04060372  | 0.4237306   | 0.0103645 |
| Nat-EurInv     | 0.4716779  | 0.27236472  | 0.6709911   | 0.0000000 |
| Nat-AmerInv    | 0.2395108  | 0.05205761  | 0.4269639   | 0.0059969 |
